# Supplementary material for: Broad-wavelength-range chemically tunable block-copolymer photonic gels
Source: Springer Nature journal article supplement (doi:10.1038/nmat2032), 2007-10-21
Supplement: 41563_2007_BFnmat2032_MOESM2_ESM.pdf [file 41563_2007_BFnmat2032_MOESM2_ESM.pdf]

# Supporting Online Material for

## Broad Wavelength Range Chemically Tunable Block Copolymer Photonic Gels

Youngjong Kang,<sup>1,2</sup> Joseph J. Walsh,<sup>1</sup> Taras Gorishnyy<sup>1</sup>  
and Edwin L. Thomas<sup>1\*</sup>

<sup>1</sup>*Department of Materials Science and Engineering,  
Massachusetts Institute of Technology  
77 Massachusetts Avenue, Cambridge, MA 022139, USA*

<sup>2</sup>*Department of Chemistry, Hanyang University  
17 Haengdang-dong, Seungdong-gu, Seoul, 133-791, Korea*

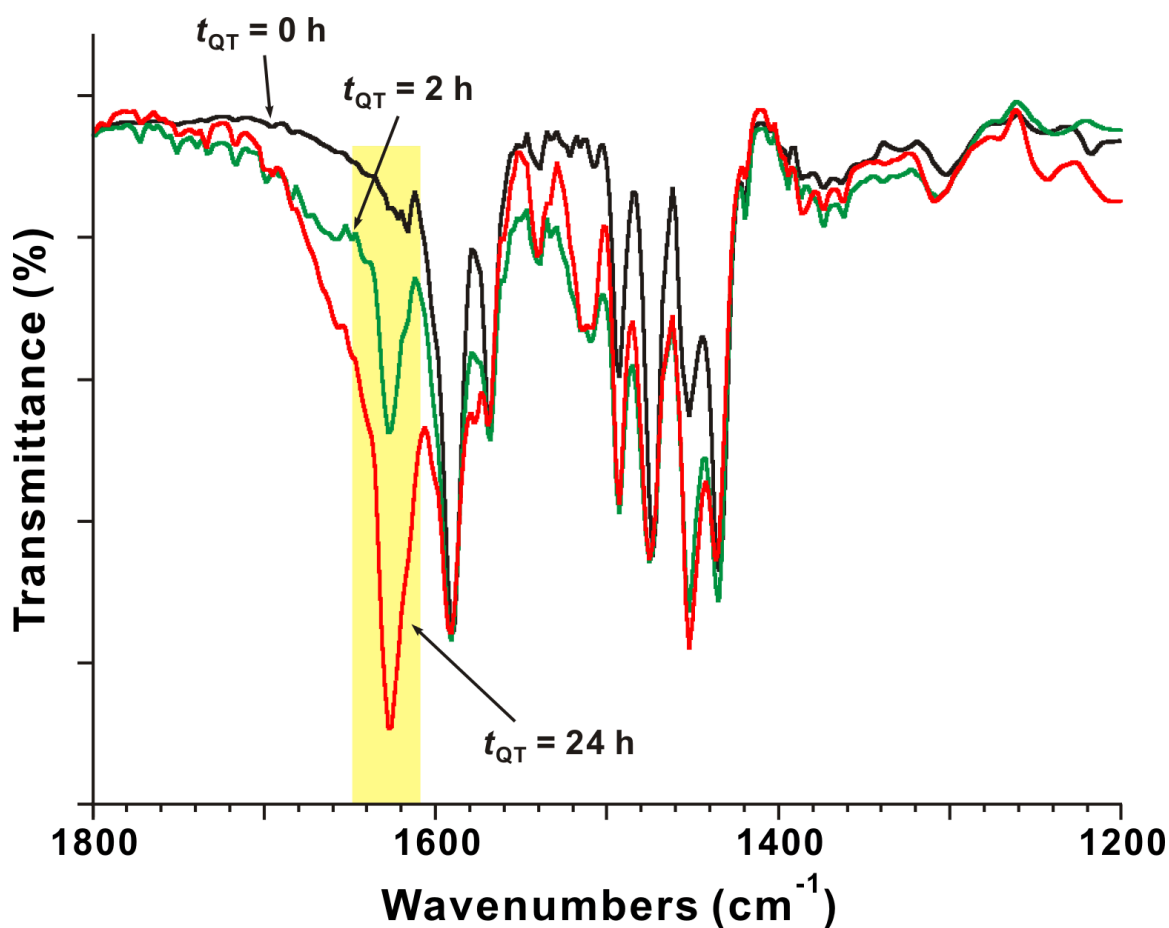

**Figure S1.** FT-IR spectra of a PS-*b*-QP2VP film obtained after various quaternization times ( $t_{QT}$ ). The characteristic pyridinium band at  $1627 \text{ cm}^{-1}$  increased with increase of the reaction time.<sup>1</sup> The spectrum obtained at  $t_{QT} = 72 \text{ h}$  was almost the same as that obtained at  $t_{QT} = 24 \text{ h}$ , which suggests that all pyridine groups can be converted to pyridinium groups after 24 h (or less) of reaction.

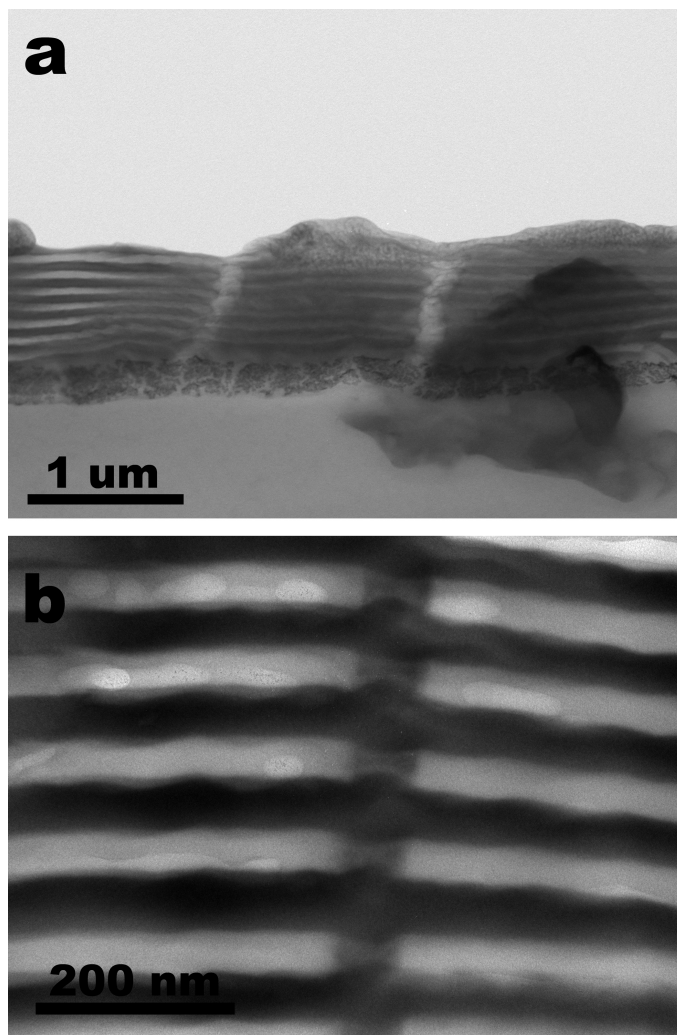

**Figure S2.** Cross sectional TEM micrographs of a dry PS-*b*-QP2VP ( $M_n \times 10^3 = 190/190$ ) photonic film spun onto an epoxy substrate and stained with I<sub>2</sub> vapor showing the PS (light) and QP2VP (dark) layers. Images indicate two types of defects; a) vertically oriented defect pores and b) helicoidal screw dislocations which contribute to the fast transport for aqueous solvents and ions when the film is immersed in aqueous solution.

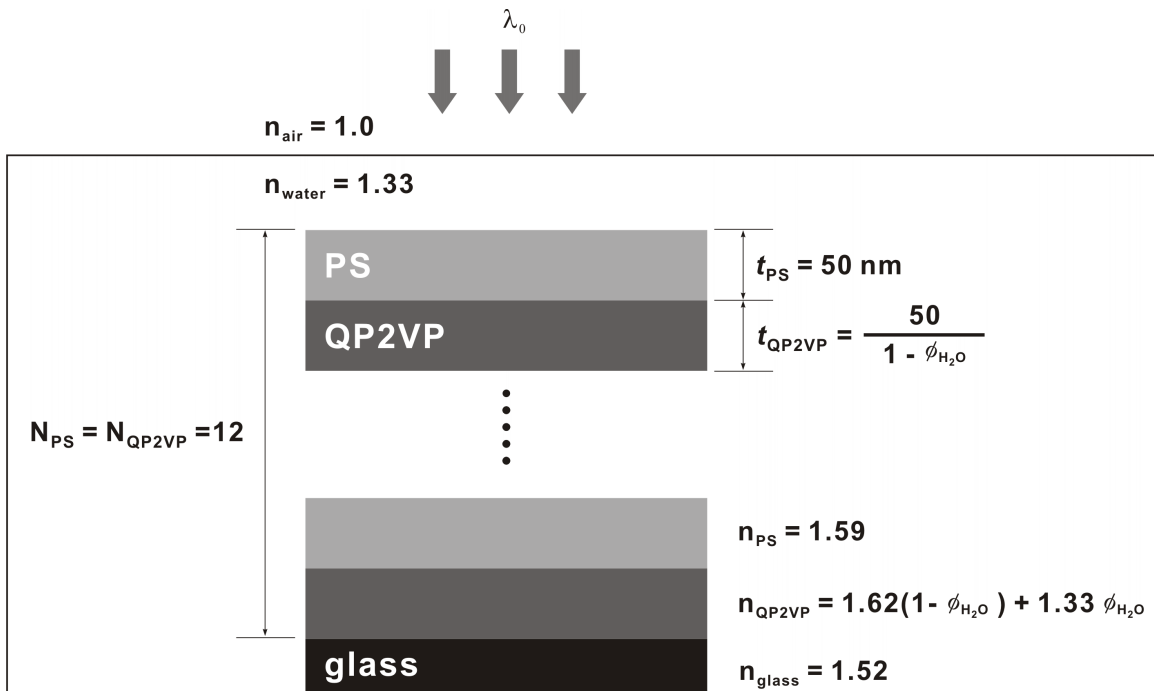

**Figure S3.** The parameters used for calculating the reflection spectra of photonic gel films by the transfer matrix model (TMM). The refractive index of QP2VP was scaled to a simple rule of mixtures based on water content of the QP2VP layers. The thickness of QP2VP was also scaled as a function of  $\phi_{\text{H}_2\text{O}}$  based on the assumption of uniaxial expansion of layers by swelling.

## REFERENCES

1. Huang, A., Xiao, C., and Zhuang, L., *J. Appl. Polym. Sci.* **96**, 2146-2153 (2005).
